# Supplementary material
Source: PubMed Central journal article supplement (PMC3027034)
Supplement: nucl0103_0273SD1.pdf [file nucl0103_0273SD1.pdf]

## Supplementary data

### Oligonucleotides

|                    |                                               |
|--------------------|-----------------------------------------------|
| lamin C2 5'        | 5'-CAT ATG GGG AAC GCG GAG GGC C-3'           |
| lamin C 5'         | 5'-CAT ATG GAG ACC CCG TCA CAG CGG C-3'       |
| lamin C2/C 3'      | 5'-TCA GCG GCG GCT GCC ACT CAC-3'             |
| lamin C2/C TAA- 3' | 5'-GCA GAA TTC ACG GCG GCT GCC ACT CAC AC-3'  |
| first step 5'      | 5'-GCT GAG GCC CGC GAG ACC CCG TCC CAG CGG-3' |
| second step 5'     | 5'-GCC ATG GGG ACC GCT GAG GGC CGC GAG-3'     |
| $\Delta$ 2-27 5'   | 5'-CGG CTG CAG GAG AAG GAG G-3'               |
| $\Delta$ 2-27 3'   | 5'-GCG GCC CTC AGC GTT CCC-3'                 |
| $\Delta$ 28-119 5' | 5'-AAT ACC AAG AAG GAG GGG GAT TTG-3'         |
| $\Delta$ 28-119 3' | 5'-TGT GAT CCG AGT GGG CGA CA-3'              |
